# Supplementary material for: MFN2 Deficiency Impairs Mitochondrial Transport and Downregulates Motor Protein Expression in Human Spinal Motor Neurons
Source: PubMed Central journal article supplement (PMC8482798; doi:10.3389/fnmol.2021.727552), 2021-09-16
Supplement: Image_1.pdf [file Image_1.pdf]

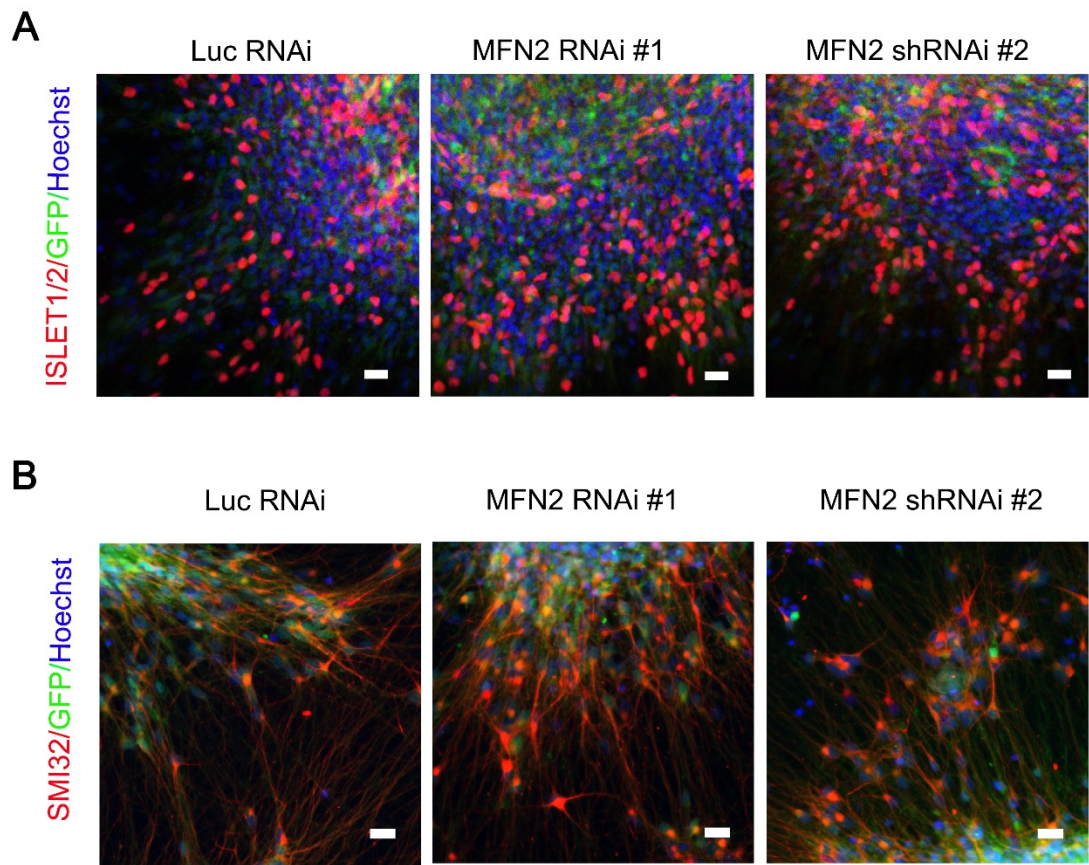

**Supplemental Figure 1: Additional motor neuron marker detection in MFN2-knockdown spinal motor neurons. (A)** ISLET1/2 immunostaining in D35 spinal motor neurons. Red: ISLET1/2, Green: GFP, Blue: Hoechst. Scale bar: 20  $\mu$ m. **(B)** SMI32 immunostaining in D35 spinal motor neurons. Red: SMI32, green: GFP, blue: Hoechst. Scale bar: 20  $\mu$ m.
